# Supplementary material
Source: HighWire-hosted journal article supplement (https://heart.bmj.com/content/109/9/686)
Supplement: inline-supplementary-material-1 [file inline-supplementary-material-1.pdf]

**Supplemental material to****Leisure-time and occupational physical activity and health  
outcomes in cardiovascular disease**

Nadia E. Bonekamp, Frank L.J. Visseren, Ynte M. Ruijgrok, Maarten-Jan M. Cramer, Gert-Jan de Borst, Anne M. May, Charlotte Koopal on behalf of the UCC-SMART study group

**Corresponding author:** Frank L.J. Visseren, Department of Vascular Medicine, University Medical Center Utrecht, PO Box 85500, 3508 GA, Utrecht, The Netherlands, [F.L.J.Visseren@umcutrecht.nl](mailto:F.L.J.Visseren@umcutrecht.nl)

## Table of contents

|                                                                                                                                                                     |    |
|---------------------------------------------------------------------------------------------------------------------------------------------------------------------|----|
| <b>Figure S1</b> – Flowchart UCC-SMART participants selection                                                                                                       | 3  |
| <b>Table S1</b> – Baseline characteristics of UCC-SMART participants stratified for OPA                                                                             | 4  |
| <b>Table S2</b> – Hazard ratios for non-fatal myocardial infarction, non-fatal stroke and cardiovascular mortality                                                  | 6  |
| <b>Table S2a</b> – Specific vascular outcomes and LTPA                                                                                                              | 6  |
| <b>Table S2b</b> – Specific vascular outcomes and OPA                                                                                                               | 7  |
| <b>Figure S2</b> - Continuous association between leisure-time physical activity and non-fatal myocardial infarction, non-fatal stroke and cardiovascular mortality | 8  |
| <b>Figure S3</b> – Interaction between LTPA and OPA on the risk of all-cause mortality recurrent vascular events, and incident T2D.                                 | 9  |
| <b>Table S3</b> – Hazard ratios for interplay between LTPA and OPA                                                                                                  | 10 |
| <b>Figure S4</b> – Associations with start of follow-up after 1, 3 and 5 years after inclusion                                                                      | 11 |
| <b>Table S4</b> – Hazard ratios for LTPA and OPA in patients that never smoked                                                                                      | 12 |
| <b>Table S4a:</b> Hazard ratios for different levels of LTPA in never-smokers.                                                                                      | 12 |
| <b>Table S4b:</b> Hazard ratios for different levels of OPA in never-smokers.                                                                                       | 13 |
| <b>Table S5</b> – Hazard ratios for OPA stratified for employment status at inclusion in the UCC-SMART cohort                                                       | 14 |
| <b>Table S5a:</b> Hazard ratios for OPA among actively employed UCC-SMART participants                                                                              | 14 |
| <b>Table S5b:</b> Hazard ratios for OPA among UCC-SMART participants without active employment                                                                      | 15 |
| <b>Table S6</b> – Hazard ratios for LTPA and OPA stratified for sex                                                                                                 | 16 |
| <b>Table S6a:</b> Hazard ratios for LTPA in female UCC-SMART participants                                                                                           | 16 |
| <b>Table S6b:</b> Hazard ratios for OPA in female UCC-SMART participants                                                                                            | 16 |
| <b>Table S6c:</b> Hazard ratios for LTPA in male UCC-SMART participants                                                                                             | 17 |
| <b>Table S6d:</b> Hazard ratios for OPA in male UCC-SMART participants                                                                                              | 17 |

**Figure S1 – Flowchart UCC-SMART participants selection**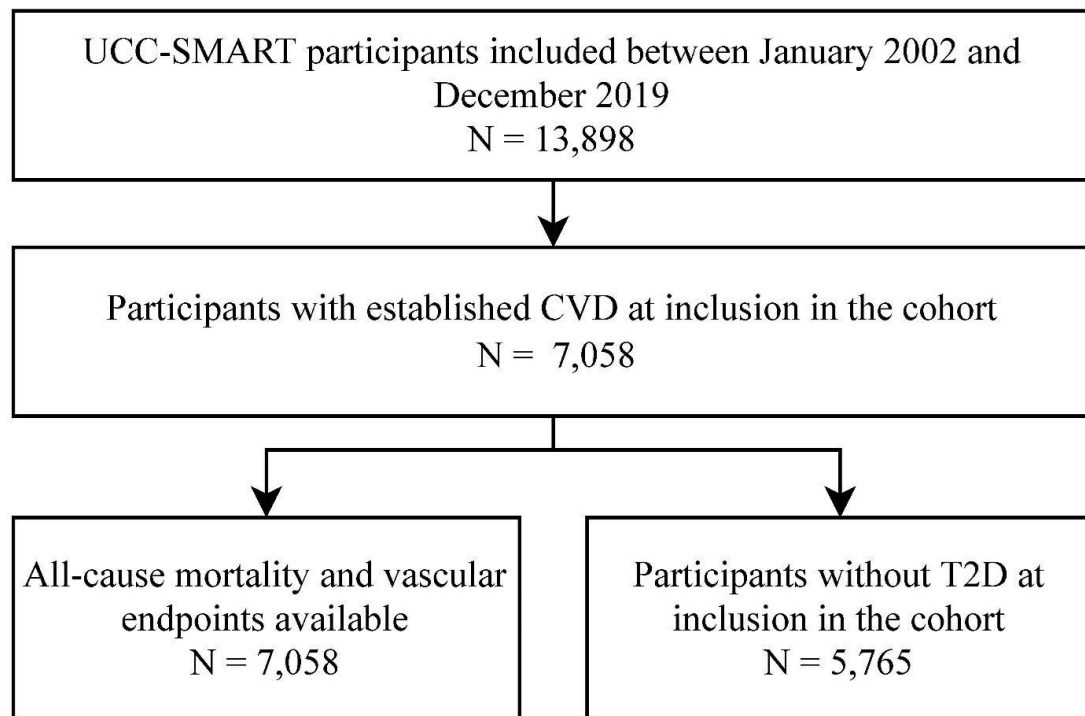

**Legend:** Flowchart describing the criteria used to create the datasets used in the analyses of the association between physical activity levels and different outcomes. All datasets were limited to participants included from January 2002 onwards, because a new questionnaire for physical activity level was introduced then. All datasets were limited to participants with established cardiovascular disease at baseline.

Data on all-cause mortality, cause-specific mortality and recurrent cardiovascular events was available for all participants.. The analysis for incident type 2 diabetes was limited to participants without diabetes at baseline.

**Table S1 – Baseline characteristics of UCC-SMART participants stratified for OPA**

| Characteristic                       | Not working           |                     |                   |                         | Working               |                     |                   |                         |
|--------------------------------------|-----------------------|---------------------|-------------------|-------------------------|-----------------------|---------------------|-------------------|-------------------------|
|                                      | Sedentary<br>N = 1600 | Standing<br>N = 808 | Manual<br>N = 924 | Heavy manual<br>N = 248 | Sedentary<br>N = 1958 | Standing<br>N = 641 | Manual<br>N = 681 | Heavy manual<br>N = 198 |
| Male sex                             | 1282 (80)             | 532 (66)            | 417 (45)          | 227 (92)                | 1626 (83)             | 434 (68)            | 440 (65)          | 186 (94)                |
| Age (years)                          | 66 ±9                 | 66 ±9               | 65 ±9             | 65 ±9                   | 55 ±9                 | 56 ±9               | 57 ±9             | 56 ±10                  |
| Leisure-time physical activity       |                       |                     |                   |                         |                       |                     |                   |                         |
| Quartile 1                           | 405 (25)              | 206 (26)            | 247 (27)          | 72 (29)                 | 509 (26)              | 139 (22)            | 147 (22)          | 40 (20)                 |
| Quartile 2                           | 430 (27)              | 202 (25)            | 219 (24)          | 49 (20)                 | 549 (28)              | 144 (23)            | 145 (21)          | 29 (15)                 |
| Quartile 3                           | 405 (25)              | 192 (24)            | 229 (25)          | 52 (21)                 | 535 (27)              | 164 (26)            | 148 (22)          | 38 (19)                 |
| Quartile 4                           | 360 (23)              | 208 (26)            | 229 (25)          | 75 (30)                 | 365 (19)              | 194 (30)            | 241 (35)          | 91 (46)                 |
| Education                            |                       |                     |                   |                         |                       |                     |                   |                         |
| Low                                  | 434 (27)              | 271 (34)            | 362 (39)          | 115 (46)                | 338 (17)              | 170 (27)            | 183 (27)          | 54 (27)                 |
| Middle                               | 548 (34)              | 334 (41)            | 485 (53)          | 119 (48)                | 702 (36)              | 280 (44)            | 412 (61)          | 128 (65)                |
| High                                 | 618 (39)              | 203 (25)            | 77 (8)            | 14 (6)                  | 918 (47)              | 191 (30)            | 86 (13)           | 16 (8)                  |
| History of CAD                       | 1084 (68)             | 502 (62)            | 582 (63)          | 182 (73)                | 1253 (64)             | 402 (63)            | 400 (59)          | 146 (74)                |
| History of CeVD                      | 454 (28)              | 254 (31)            | 287 (31)          | 67 (27)                 | 538 (28)              | 190 (30)            | 217 (32)          | 46 (23)                 |
| History of PAD                       | 225 (14)              | 140 (17)            | 129 (14)          | 44 (18)                 | 276 (14)              | 82 (13)             | 94 (14)           | 13 (7)                  |
| History of AAA                       | 148 (9)               | 61 (8)              | 66 (7)            | 32 (13)                 | 92 (5)                | 28 (4)              | 42 (6)            | 12 (6)                  |
| Multiple types of pre-existing CVD   | 275 (17)              | 130 (16)            | 123 (13)          | 66 (27)                 | 189 (10)              | 54 (8)              | 67 (10)           | 19 (10)                 |
| Diabetes mellitus                    | 351 (22)              | 159 (20)            | 202 (22)          | 55 (22)                 | 243 (12)              | 97 (15)             | 84 (12)           | 19 (10)                 |
| Metabolic syndrome                   | 835 (52)              | 404 (50)            | 547 (59)          | 155 (63)                | 920 (47)              | 320 (50)            | 335 (49)          | 108 (55)                |
| Current smoking                      | 333 (21)              | 193 (24)            | 240 (26)          | 78 (32)                 | 543 (28)              | 217 (34)            | 245 (36)          | 72 (36)                 |
| Alcohol consumption                  | 1236 (77)             | 547 (68)            | 547 (59)          | 152 (61)                | 1590 (81)             | 461 (72)            | 456 (67)          | 122 (62)                |
| Body mass index (kg/m <sup>2</sup> ) | 26.85 (4)             | 26.89 (4)           | 27.34 (4)         | 28.29 (4)               | 26.89 (4)             | 26.93 (4)           | 27.21 (4)         | 28.42 (5)               |
| <25 kg/m <sup>2</sup>                | 546 (34)              | 284 (35)            | 279 (30)          | 46 (19)                 | 634 (32)              | 229 (36)            | 214 (31)          | 42 (21)                 |
| 25-30 kg/m <sup>2</sup>              | 754 (47)              | 347 (43)            | 432 (47)          | 129 (52)                | 962 (49)              | 279 (44)            | 312 (46)          | 98 (50)                 |
| >30 kg/m <sup>2</sup>                | 300 (19)              | 177 (22)            | 213 (23)          | 73 (29)                 | 362 (19)              | 133 (21)            | 155 (23)          | 58 (29)                 |
| Systolic blood pressure (mmHg)       | 139 ±20               | 142 ±21             | 143 ±22           | 140 ±21                 | 134 ±19               | 136 ±20             | 138 ±20           | 135 ±19                 |
| LDL cholesterol (mmol/l)             | 2.4 [1.9-3.0]         | 2.5 [1.9-3.1]       | 2.4 [2.0-3.1]     | 2.5 [1.9-3.1]           | 2.4 [1.9-3.1]         | 2.5 [2.0-3.3]       | 2.6 [2.0-3.2]     | 2.5 [2.0-3.2]           |
| Antihypertensive medication          | 1314 (82)             | 649 (80)            | 749 (81)          | 211 (85)                | 1448 (74)             | 473 (74)            | 487 (72)          | 164 (83)                |
| Lipid-lowering treatment             | 1252 (78)             | 618 (77)            | 727 (79)          | 209 (84)                | 1543 (79)             | 497 (78)            | 497 (73)          | 158 (80)                |

**Legend:** Data are presented as number (%), mean  $\pm$  standard deviation or median [interquartile range] as appropriate. Abbreviations: METh/wk: Metabolic equivalent of task hours per week, CAD: coronary artery disease, CeVD: cerebrovascular disease, PAD: peripheral artery disease, AAA: abdominal aortic aneurysm, LDL: low density lipoprotein, HDL: high density lipoprotein.

**Table S2 – Hazard ratios for non-fatal myocardial infarction, non-fatal stroke and cardiovascular mortality**

Table S2a – Specific vascular outcomes and LTPA

|                                        | Leisure-time physical activity level |                  |                  |                  |
|----------------------------------------|--------------------------------------|------------------|------------------|------------------|
|                                        | Quartile 1                           | Quartile 2       | Quartile 3       | Quartile 4       |
| <b>Non-fatal myocardial infarction</b> |                                      |                  |                  |                  |
| Events/N total                         | 325/1,765                            | 322/1,767        | 345/1,763        | 357/1,763        |
| Follow-up (persyr)                     | 13,030                               | 13,196           | 13,013           | 12,832           |
| Model 1                                | <i>Reference</i>                     | 0.97 (0.83-1.13) | 1.03 (0.89-1.20) | 1.06 (0.91-1.23) |
| Model 2                                | <i>Reference</i>                     | 1.00 (0.86-1.17) | 1.07 (0.92-1.25) | 1.06 (0.91-1.24) |
| Model 3                                | <i>Reference</i>                     | 1.03 (0.88-1.21) | 1.12 (0.96-1.30) | 1.12 (0.96-1.30) |
| <b>Non-fatal stroke</b>                |                                      |                  |                  |                  |
| Events/N total                         | 96/1,765                             | 87/1,767         | 57/1,763         | 82/1,763         |
| Follow-up (persyr)                     | 14,592                               | 14,992           | 14,946           | 14,912           |
| Model 1                                | <i>Reference</i>                     | 0.87 (0.65-1.16) | 0.57 (0.41-0.79) | 0.81 (0.60-1.09) |
| Model 2                                | <i>Reference</i>                     | 0.93 (0.69-1.24) | 0.62 (0.44-0.86) | 0.87 (0.64-1.17) |
| Model 3                                | <i>Reference</i>                     | 0.92 (0.69-1.23) | 0.61 (0.44-0.86) | 0.86 (0.64-1.16) |
| <b>Cardiovascular mortality</b>        |                                      |                  |                  |                  |
| Events/N total                         | 187/1,765                            | 133/1,767        | 103/1,763        | 101/1,763        |
| Follow-up (persyr)                     | 15,007                               | 15,392           | 15,218           | 15,214           |
| Model 1                                | <i>Reference</i>                     | 0.68 (0.54-0.84) | 0.52 (0.41-0.66) | 0.49 (0.38-0.62) |
| Model 2                                | <i>Reference</i>                     | 0.73 (0.59-0.92) | 0.57 (0.45-0.72) | 0.54 (0.42-0.69) |
| Model 3                                | <i>Reference</i>                     | 0.76 (0.61-0.96) | 0.61 (0.48-0.78) | 0.58 (0.45-0.74) |

**Legend:** Hazard ratios and corresponding 95% confidence intervals for non-fatal myocardial infarction, non-fatal stroke and cardiovascular mortality. In Model 1 adjustments were made for age and sex. In Model 2 adjustments were made for Model 1 + smoking status, packyears, alcohol consumption, and education. In Model 3 adjustments were made for Model 2 + diabetes mellitus, body mass index, systolic blood pressure and LDL-cholesterol levels.

Abbreviations: persyr: person year

Table S2b – Specific vascular outcomes and OPA

|                                        | Occupational physical activity level |                  |                  |                  |
|----------------------------------------|--------------------------------------|------------------|------------------|------------------|
|                                        | Sedentary                            | Standing         | Manual           | Heavy manual     |
| <b>Non-fatal myocardial infarction</b> |                                      |                  |                  |                  |
| Events/N total                         | 662/3,558                            | 258/1,449        | 321/1,605        | 108/446          |
| Follow-up (persyr)                     | 25,331                               | 10,994           | 12,578           | 3,170            |
| Model 1                                | <i>Reference</i>                     | 0.97 (0.84-1.13) | 1.16 (1.01-1.33) | 1.22 (0.99-1.49) |
| Model 2                                | <i>Reference</i>                     | 0.92 (0.80-1.07) | 1.06 (0.92-1.22) | 1.07 (0.87-1.32) |
| Model 3                                | <i>Reference</i>                     | 0.92 (0.79-1.06) | 1.05 (0.91-1.21) | 1.05 (0.85-1.29) |
| <b>Non-fatal stroke</b>                |                                      |                  |                  |                  |
| Events/N total                         | 127/3,558                            | 74/1,449         | 91/1,605         | 30/446           |
| Follow-up (persyr)                     | 28,934                               | 12,415           | 14,394           | 3,699            |
| Model 1                                | <i>Reference</i>                     | 1.31 (0.98-1.75) | 1.40 (1.05-1.85) | 1.77 (1.19-2.64) |
| Model 2                                | <i>Reference</i>                     | 1.27 (0.95-1.70) | 1.35 (1.01-1.81) | 1.66 (1.10-2.50) |
| Model 3                                | <i>Reference</i>                     | 1.25 (0.93-1.68) | 1.34 (1.00-1.79) | 1.74 (1.15-2.63) |
| <b>Cardiovascular mortality</b>        |                                      |                  |                  |                  |
| Events/N total                         | 233/3,558                            | 131/1,449        | 125/1,605        | 35/446           |
| Follow-up (persyr)                     | 29,482                               | 12,713           | 14,804           | 3,831            |
| Model 1                                | <i>Reference</i>                     | 1.22 (0.98-1.51) | 1.04 (0.83-1.31) | 1.03 (0.72-1.46) |
| Model 2                                | <i>Reference</i>                     | 1.14 (0.92-1.42) | 0.93 (0.74-1.17) | 0.90 (0.62-1.29) |
| Model 3                                | <i>Reference</i>                     | 1.12 (0.90-1.39) | 0.91 (0.72-1.15) | 0.89 (0.62-1.28) |

**Legend:** Hazard ratios and corresponding 95% confidence intervals for non-fatal myocardial infarction, non-fatal stroke and cardiovascular mortality. In Model 1 adjustments were made for age and sex. In Model 2 adjustments were made for Model 1 + smoking status, packyears, alcohol consumption, and education. In Model 3 adjustments were made for Model 2 + diabetes mellitus, body mass index, systolic blood pressure and LDL-cholesterol levels.

Abbreviations: persyr: person year.

**Figure S2 - Continuous association between leisure-time physical activity and non-fatal myocardial infarction, non-fatal stroke and cardiovascular mortality**

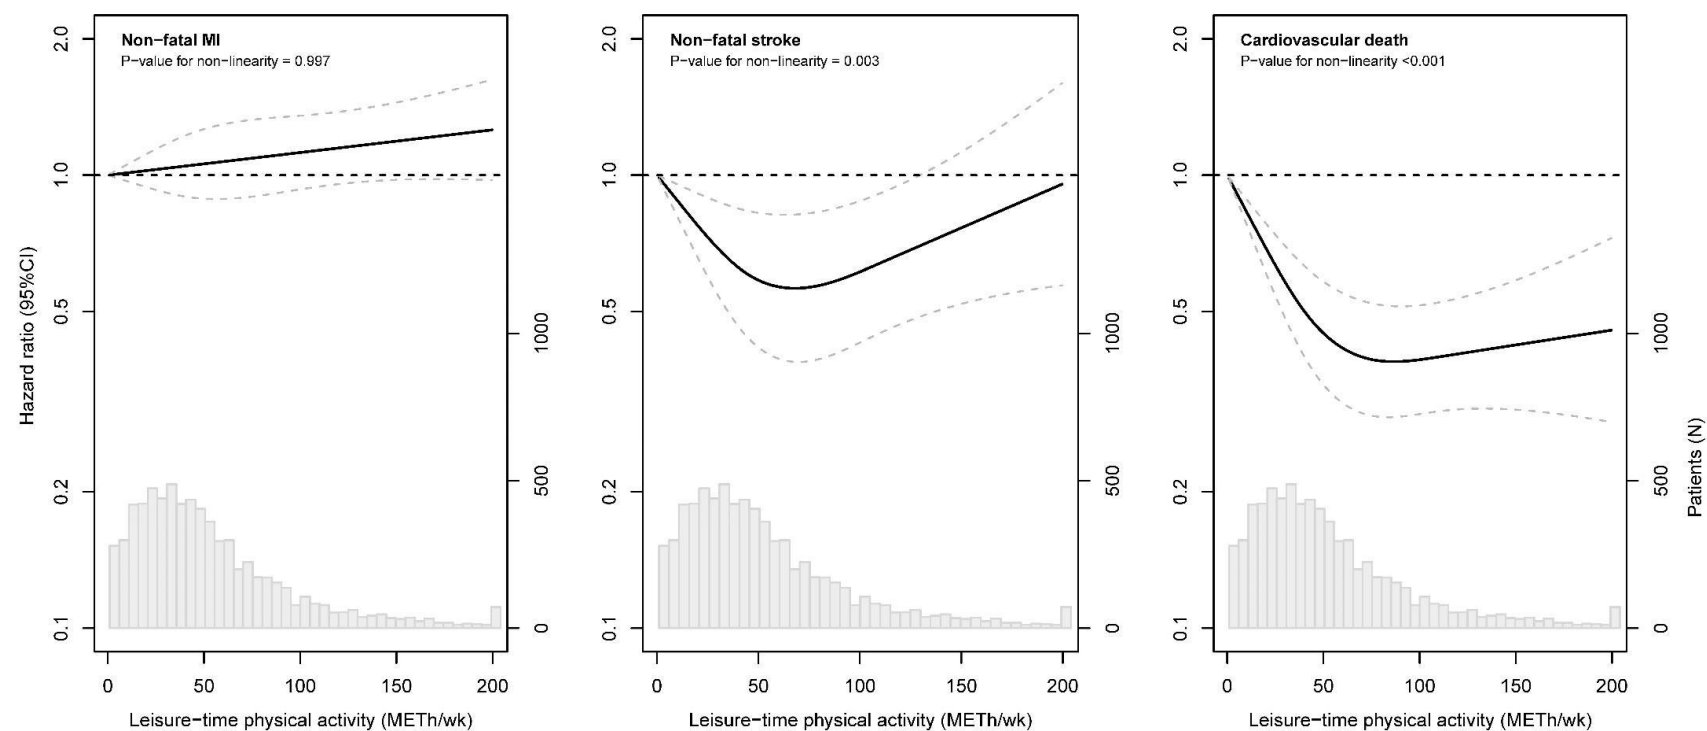

Legend: Hazard ratios are adjusted for age, sex, smoking status, pack years, alcohol consumption, education and current employment (model 3). The histograms inside the figures represent the number of study participants that achieved a certain leisure-time physical activity level.

Abbreviations: METh/wk: Metabolic equivalent of task hours per week. 95%CI: 95% confidence interval



**Figure S3 – Interaction between LTPA and OPA on the risk of all-cause mortality recurrent vascular events, and incident T2D.**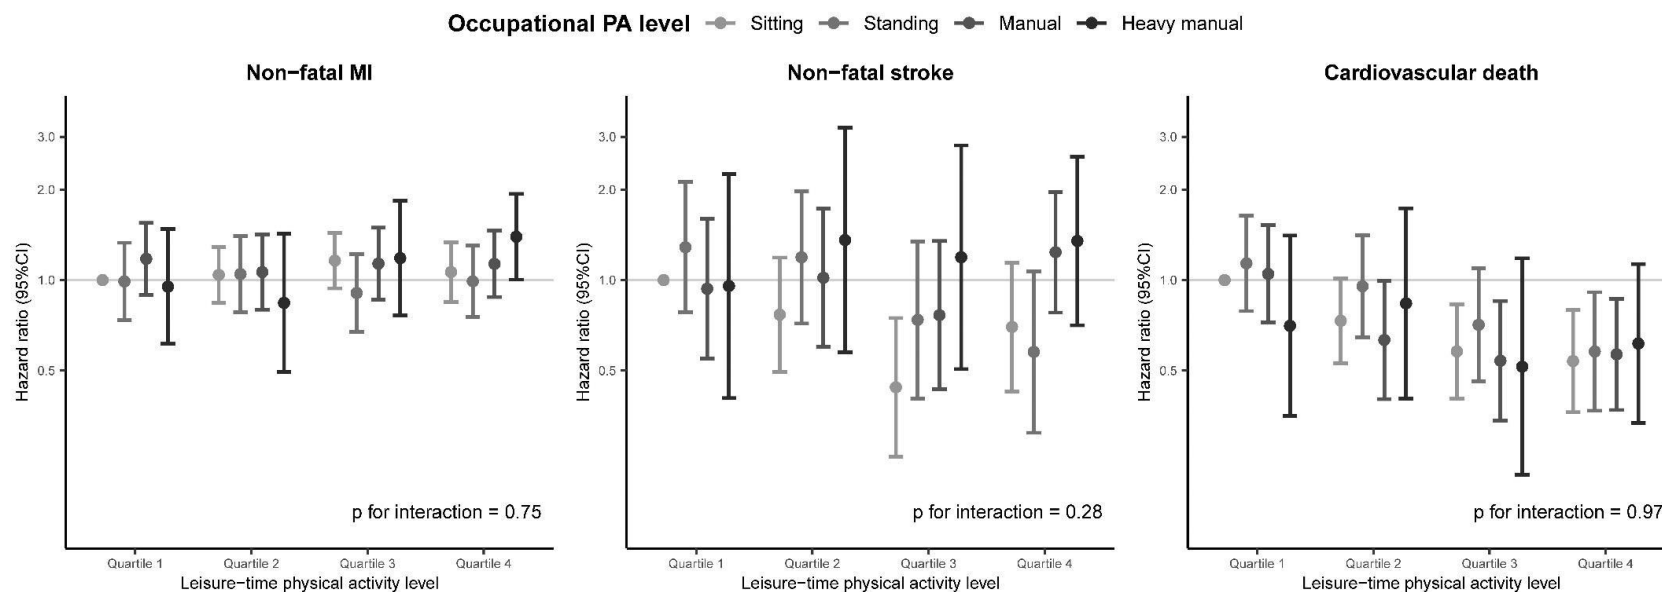

**Legend:** Hazard ratios assessing the interaction between LTPA and OPA level in the association with the individual components of the combined vascular endpoint: non-fatal myocardial infarction, non-fatal stroke and cardiovascular death. These figures show the hazard ratios for each combination of leisure-time and OPA level with the least active (quartile 1 leisure-time and sedentary OPA) as reference category. Models were adjusted for age, sex, smoking, packyears, alcohol consumption, education and current employment.

**Abbreviations:** 95%CI: 95% confidence interval, Mi: myocardial infarction.

**Table S3 – Hazard ratios for interplay between LTPA and OPA**

Table S3a - All-cause mortality

|                                                |              | Leisure-time physical activity, HR (95%CI) |                  |                  |                  |
|------------------------------------------------|--------------|--------------------------------------------|------------------|------------------|------------------|
|                                                |              | Quarter 1                                  | Quarter 2        | Quarter 3        | Quarter 4        |
| <b>Oc<br/>cu<br/>pa<br/>tio<br/>nal<br/>PA</b> | Sedentary    | <i>Reference</i>                           | 0.74 (0.59-0.92) | 0.64 (0.51-0.81) | 0.67 (0.53-0.86) |
|                                                | Standing     | 1.21 (0.95-1.54)                           | 0.89 (0.68-1.17) | 0.77 (0.58-1.02) | 0.70 (0.53-0.94) |
|                                                | Manual       | 1.07 (0.84-1.37)                           | 0.76 (0.57-1.01) | 0.63 (0.47-0.84) | 0.64 (0.49-0.85) |
|                                                | Heavy manual | 1.10 (0.75-1.62)                           | 0.87 (0.53-1.44) | 0.73 (0.45-1.18) | 0.72 (0.48-1.07) |

Table S3b - Recurrent vascular events

|                                                |              | Leisure-time physical activity, HR (95%CI) |                  |                  |                  |
|------------------------------------------------|--------------|--------------------------------------------|------------------|------------------|------------------|
|                                                |              | Quarter 1                                  | Quarter 2        | Quarter 3        | Quarter 4        |
| <b>Oc<br/>cu<br/>pa<br/>tio<br/>nal<br/>PA</b> | Sedentary    | <i>Reference</i>                           | 0.86 (0.69-1.08) | 0.59 (0.46-0.76) | 0.63 (0.48-0.82) |
|                                                | Standing     | 1.07 (0.81-1.42)                           | 0.88 (0.66-1.19) | 0.73 (0.53-1.00) | 0.58 (0.42-0.8)  |
|                                                | Manual       | 1.00 (0.76-1.32)                           | 0.87 (0.65-1.16) | 0.76 (0.56-1.02) | 0.84 (0.64-1.1)  |
|                                                | Heavy manual | 0.94 (0.61-1.47)                           | 0.65 (0.36-1.16) | 0.78 (0.47-1.31) | 1.08 (0.75-1.55) |

Table S3c - Incident type 2 diabetes

|                                                |              | Leisure-time physical activity, HR (95%CI) |                  |                  |                  |
|------------------------------------------------|--------------|--------------------------------------------|------------------|------------------|------------------|
|                                                |              | Quarter 1                                  | Quarter 2        | Quarter 3        | Quarter 4        |
| <b>Oc<br/>cu<br/>pa<br/>tio<br/>nal<br/>PA</b> | Sedentary    | <i>Reference</i>                           | 0.79 (0.55-1.13) | 0.83 (0.58-1.20) | 0.74 (0.49-1.11) |
|                                                | Standing     | 1.02 (0.64-1.61)                           | 0.86 (0.54-1.38) | 0.84 (0.52-1.36) | 0.54 (0.32-0.92) |
|                                                | Manual       | 0.86 (0.56-1.33)                           | 0.90 (0.57-1.42) | 0.87 (0.55-1.38) | 0.77 (0.50-1.18) |
|                                                | Heavy manual | 1.15 (0.62-2.13)                           | 1.04 (0.48-2.28) | 0.80 (0.35-1.84) | 0.71 (0.36-1.38) |

**Legend:** Hazard ratios assessing the interaction between LTPA and OPA level in the association with all-cause mortality, recurrent vascular events and incident type 2 diabetes. All presented hazard ratios are relative to people with sedentary OPA and LTPA quarter 1. Models were adjusted for age, sex, smoking, pack years, alcohol consumption, education and current employment.

**Abbreviations:** 95%CI: 95% confidence interval, HR: hazard ratio

**Figure S4 – Associations with start of follow-up after 1, 3 and 5 years after inclusion.**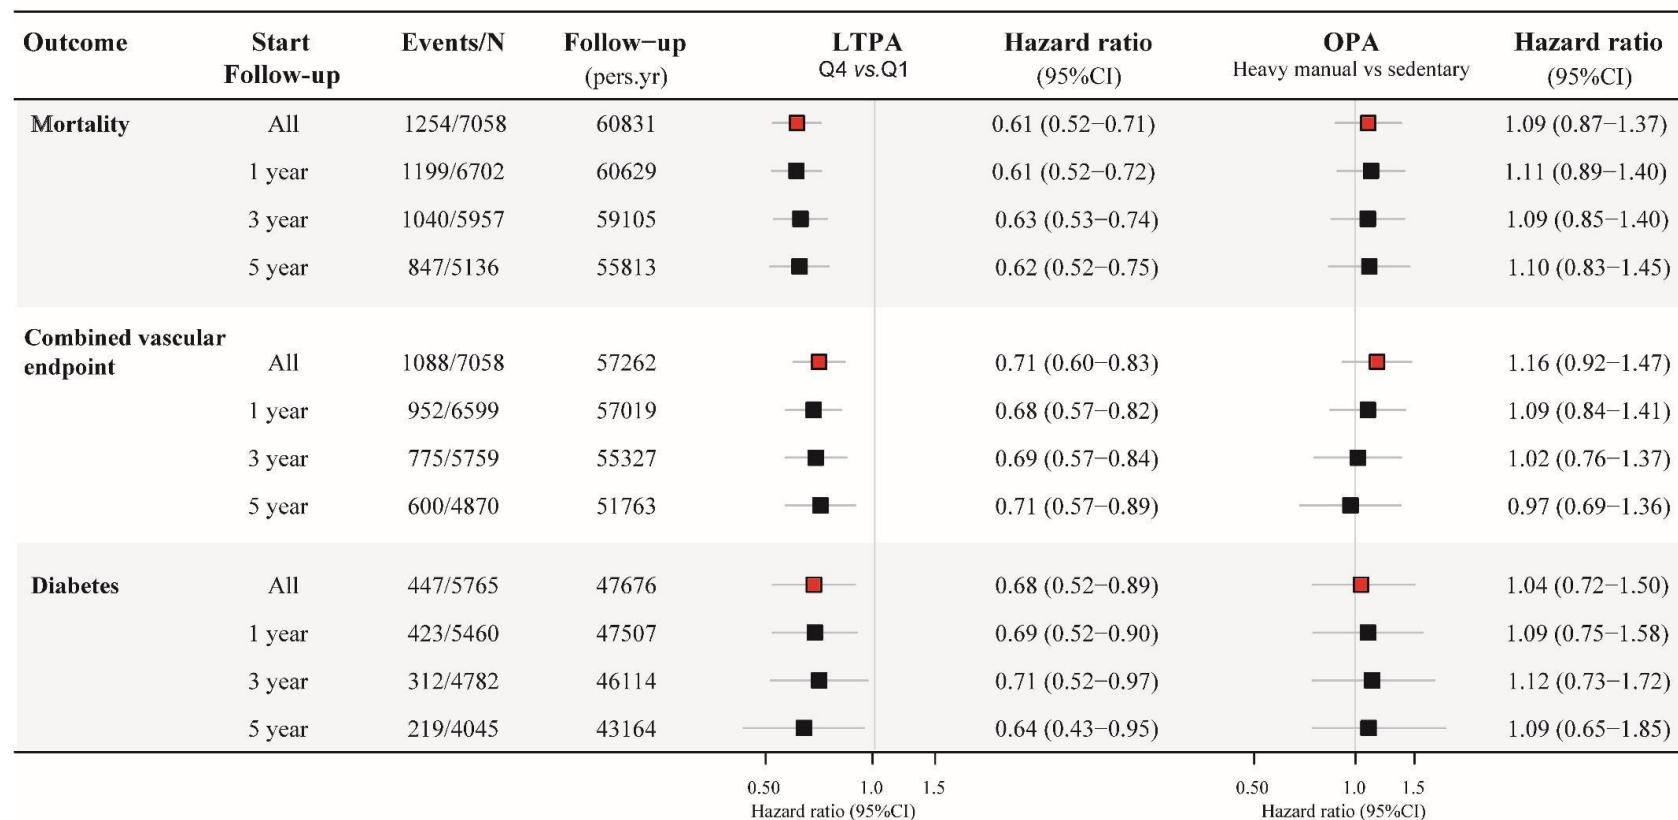

**Legend:** Hazard ratios for all-cause mortality, recurrent cardiovascular events, and incident type 2 diabetes with the full dataset and with datasets that exclude participants with an event in the first 1, 3 or 5 years after inclusion. The presented estimates were adjusted for the covariates included in model 3. These figures show the hazard ratio for the highest quartile vs. these lowest quartile of leisure-time physical activity and the highest level of occupational physical activity (heavy manual work) vs. sedentary.

Abbreviations: FU: follow-up, pers.yr: person year, 95%CI: 95% confidence interval, LTPA: leisure-time physical activity, OPA: Occupational physical activity.

**Table S4 – Hazard ratios for LTPA and OPA in patients that never smoked**

Table S4a: Hazard ratios for different levels of LTPA in never-smokers.

|                                   | Leisure-time physical activity level |                  |                  |                  |
|-----------------------------------|--------------------------------------|------------------|------------------|------------------|
|                                   | Quartile 1                           | Quartile 2       | Quartile 3       | Quartile 4       |
| <b>All-cause mortality</b>        |                                      |                  |                  |                  |
| Events/N total                    | 64/374                               | 50/426           | 33/441           | 44/447           |
| Follow-up (persyr)                | 2910                                 | 3620             | 3675             | 3783             |
| Model 1                           | <i>Reference</i>                     | 0.66 (0.45-0.96) | 0.48 (0.31-0.74) | 0.55 (0.37-0.81) |
| Model 2                           | <i>Reference</i>                     | 0.66 (0.45-0.96) | 0.50 (0.33-0.77) | 0.56 (0.38-0.83) |
| Model 3                           | <i>Reference</i>                     | 0.72 (0.49-1.05) | 0.55 (0.36-0.85) | 0.66 (0.44-0.98) |
| <b>Combined vascular endpoint</b> |                                      |                  |                  |                  |
| Events/N total                    | 57/374                               | 50/426           | 29/441           | 50/447           |
| Follow-up (persyr)                | 2722                                 | 3453             | 3550             | 3596             |
| Model 1                           | <i>Reference</i>                     | 0.71 (0.49-1.04) | 0.42 (0.27-0.66) | 0.68 (0.46-0.99) |
| Model 2                           | <i>Reference</i>                     | 0.74 (0.50-1.08) | 0.45 (0.29-0.71) | 0.45 (0.29-0.71) |
| Model 3                           | <i>Reference</i>                     | 0.77 (0.52-1.13) | 0.47 (0.30-0.75) | 0.46 (0.28-0.73) |
| <b>Type 2 diabetes</b>            |                                      |                  |                  |                  |
| Events/N total                    | 24/363                               | 15/408           | 21/434           | 19/442           |
| Follow-up (persyr)                | 2428                                 | 2847             | 2969             | 3084             |
| Model 1                           | <i>Reference</i>                     | 0.54 (0.28-1.04) | 0.73 (0.40-1.31) | 0.62 (0.34-1.14) |
| Model 2                           | <i>Reference</i>                     | 0.62 (0.32-1.19) | 0.83 (0.46-1.52) | 0.67 (0.36-1.23) |
| Model 3                           | <i>Reference</i>                     | 0.66 (0.34-1.29) | 0.94 (0.51-1.72) | 0.80 (0.43-1.48) |

**Legend:** Sensitivity analysis limited to SMART participants that reported they had never smoked (N = 1688). This table shows hazard ratios and corresponding 95% confidence intervals all-cause mortality, recurrent cardiovascular events, and incident type 2 diabetes. In Model 1 adjustments were made for age and sex. In Model 2 adjustments were made for Model 1 + smoking status, packyears, alcohol consumption, and education. In Model 3 adjustments were made for Model 2 + diabetes mellitus, body mass index, systolic blood pressure and LDL-cholesterol levels.

\* The combined vascular endpoints was a composite of non-fatal myocardial infarction, non-fatal stroke and cardiovascular mortality.

Abbreviations: persyr: person year.

Table S4b: Hazard ratios for different levels of OPA in never-smokers.

|                                   | <b>Occupational physical activity level</b> |                  |                  |                     |
|-----------------------------------|---------------------------------------------|------------------|------------------|---------------------|
|                                   | <b>Sedentary</b>                            | <b>Standing</b>  | <b>Manual</b>    | <b>Heavy manual</b> |
| <b>All-cause mortality</b>        |                                             |                  |                  |                     |
| Events/N total                    | 73/869                                      | 40/329           | 63/393           | 15/97               |
| Follow-up (persyr)                | 6661                                        | 2942             | 3486             | 898                 |
| Model 1                           | <i>Reference</i>                            | 0.98 (0.66-1.45) | 1.24 (0.84-1.82) | 1.01 (0.58-1.76)    |
| Model 2                           | <i>Reference</i>                            | 0.97 (0.65-1.44) | 1.27 (0.85-1.89) | 1.04 (0.58-1.86)    |
| Model 3                           | <i>Reference</i>                            | 0.93 (0.62-1.38) | 1.26 (0.84-1.87) | 1.03 (0.58-1.86)    |
| <b>Combined vascular endpoint</b> |                                             |                  |                  |                     |
| Events/N total                    | 73/869                                      | 39/329           | 58/393           | 16/97               |
| Follow-up (persyr)                | 6408                                        | 2789             | 3279             | 845                 |
| Model 1                           | <i>Reference</i>                            | 1.10 (0.74-1.64) | 1.31 (0.89-1.93) | 1.44 (0.83-2.47)    |
| Model 2                           | <i>Reference</i>                            | 1.02 (0.68-1.52) | 1.20 (0.81-1.79) | 1.20 (0.81-1.79)    |
| Model 3                           | <i>Reference</i>                            | 0.99 (0.66-1.48) | 1.18 (0.79-1.77) | 1.26 (0.72-2.21)    |
| <b>Type 2 diabetes</b>            |                                             |                  |                  |                     |
| Events/N total                    | 32/752                                      | 11/271           | 30/306           | 6/84                |
| Follow-up (persyr)                | 5603                                        | 2400             | 2579             | 744                 |
| Model 1                           | <i>Reference</i>                            | 0.77 (0.38-1.55) | 1.94 (1.11-3.37) | 1.29 (0.53-3.09)    |
| Model 2                           | <i>Reference</i>                            | 0.76 (0.37-1.54) | 1.87 (1.04-3.37) | 1.17 (0.47-2.92)    |
| Model 3                           | <i>Reference</i>                            | 0.74 (0.36-1.50) | 1.85 (1.01-3.36) | 1.04 (0.41-2.58)    |

**Legend:** Sensitivity analysis limited to SMART participants that reported they had never smoked (N = 1688). This table shows hazard ratios and corresponding 95% confidence intervals all-cause mortality, recurrent cardiovascular events, and incident type 2 diabetes. In Model 1 adjustments were made for age and sex. In Model 2 adjustments were made for Model 1 + alcohol consumption, and education. In Model 3 adjustments were made for Model 2 + diabetes mellitus, body mass index, systolic blood pressure and LDL-cholesterol levels.

\* The combined vascular endpoints was a composite of non-fatal myocardial infarction, non-fatal stroke and cardiovascular mortality.

Abbreviations: persyr: person year.

**Table S5 – Hazard ratios for OPA stratified for employment status at inclusion in the UCC-SMART cohort**

Table S5a: Hazard ratios for OPA among actively employed UCC-SMART participants

|                                   | <b>Occupational physical activity level</b> |                  |                  |                     |
|-----------------------------------|---------------------------------------------|------------------|------------------|---------------------|
|                                   | <b>Sedentary</b>                            | <b>Standing</b>  | <b>Manual</b>    | <b>Heavy manual</b> |
| <b>All-cause mortality</b>        |                                             |                  |                  |                     |
| Events/N total                    | 166/1958                                    | 77/641           | 84/681           | 23/198              |
| Follow-up (persyr)                | 16696                                       | 5811             | 6425             | 1744                |
| Model 1                           | <i>Reference</i>                            | 1.22 (0.93-1.61) | 1.09 (0.83-1.43) | 1.13 (0.73-1.74)    |
| Model 2                           | <i>Reference</i>                            | 1.13 (0.86-1.49) | 0.95 (0.72-1.26) | 1.04 (0.66-1.62)    |
| Model 3                           | <i>Reference</i>                            | 1.11 (0.84-1.46) | 0.98 (0.74-1.29) | 1.13 (0.72-1.77)    |
| <b>Combined vascular endpoint</b> |                                             |                  |                  |                     |
| Events/N total                    | 198/1958                                    | 73/641           | 106/681          | 36/198              |
| Follow-up (persyr)                | 15987                                       | 5563             | 6021             | 1588                |
| Model 1                           | <i>Reference</i>                            | 1.12 (0.85-1.47) | 1.50 (1.18-1.90) | 1.65 (1.15-2.35)    |
| Model 2                           | <i>Reference</i>                            | 1.03 (0.79-1.36) | 1.30 (1.01-1.67) | 1.30 (1.01-1.67)    |
| Model 3                           | <i>Reference</i>                            | 1.01 (0.77-1.33) | 1.29 (1.01-1.66) | 1.54 (1.06-2.23)    |
| <b>Type 2 diabetes</b>            |                                             |                  |                  |                     |
| Events/N total                    | 127/1704                                    | 43/539           | 45/591           | 18/174              |
| Follow-up (persyr)                | 13861                                       | 4620             | 5396             | 1445                |
| Model 1                           | <i>Reference</i>                            | 1.09 (0.77-1.55) | 0.97 (0.69-1.37) | 1.26 (0.77-2.07)    |
| Model 2                           | <i>Reference</i>                            | 0.99 (0.70-1.41) | 0.81 (0.57-1.16) | 1.13 (0.68-1.89)    |
| Model 3                           | <i>Reference</i>                            | 0.98 (0.69-1.40) | 0.84 (0.59-1.21) | 1.01 (0.61-1.69)    |

**Legend:** Sensitivity analysis limited to SMART participants that reported they had active employment at the moment of inclusion in the cohort (n = 3,478). This table shows hazard ratios and corresponding 95% confidence intervals all-cause mortality, recurrent cardiovascular events, and incident type 2 diabetes. In Model 1 adjustments were made for age and sex. In Model 2 adjustments were made for Model 1 + smoking status, pack years, alcohol consumption, and education. In Model 3 adjustments were made for Model 2 + diabetes mellitus, body mass index, systolic blood pressure and LDL-cholesterol levels.

\* The combined vascular endpoints was a composite of non-fatal myocardial infarction, non-fatal stroke and cardiovascular mortality.

Abbreviations: persyr: person year

Table S5b: Hazard ratios for OPA among UCC-SMART participants without active employment

|                                   | <b>Occupational physical activity level</b> |                  |                  |                     |
|-----------------------------------|---------------------------------------------|------------------|------------------|---------------------|
|                                   | <b>Sedentary</b>                            | <b>Standing</b>  | <b>Manual</b>    | <b>Heavy manual</b> |
| <b>All-cause mortality</b>        |                                             |                  |                  |                     |
| Events/N total                    | 374/1600                                    | 230/808          | 229/924          | 71/248              |
| Follow-up (persyr)                | 12786                                       | 6902             | 8380             | 2087                |
| Model 1                           | <i>Reference</i>                            | 1.17 (0.99-1.38) | 1.04 (0.87-1.24) | 1.19 (0.92-1.53)    |
| Model 2                           | <i>Reference</i>                            | 1.14 (0.96-1.34) | 0.98 (0.82-1.17) | 1.07 (0.83-1.39)    |
| Model 3                           | <i>Reference</i>                            | 1.13 (0.95-1.33) | 0.97 (0.81-1.15) | 1.07 (0.83-1.39)    |
| <b>Combined vascular endpoint</b> |                                             |                  |                  |                     |
| Events/N total                    | 288/1600                                    | 158/808          | 178/924          | 51/248              |
| Follow-up (persyr)                | 11993                                       | 6405             | 7786             | 1918                |
| Model 1                           | <i>Reference</i>                            | 1.05 (0.87-1.28) | 1.03 (0.85-1.26) | 1.13 (0.84-1.53)    |
| Model 2                           | <i>Reference</i>                            | 1.01 (0.83-1.22) | 0.96 (0.78-1.18) | 0.96 (0.78-1.18)    |
| Model 3                           | <i>Reference</i>                            | 1.00 (0.82-1.22) | 0.95 (0.78-1.17) | 0.98 (0.72-1.34)    |
| <b>Type 2 diabetes</b>            |                                             |                  |                  |                     |
| Events/N total                    | 87/1244                                     | 44/624           | 66/696           | 17/193              |
| Follow-up (persyr)                | 9653                                        | 5127             | 6015             | 1559                |
| Model 1                           | <i>Reference</i>                            | 0.96 (0.67-1.39) | 1.24 (0.88-1.73) | 1.20 (0.71-2.01)    |
| Model 2                           | <i>Reference</i>                            | 0.91 (0.63-1.31) | 1.11 (0.79-1.56) | 1.00 (0.59-1.69)    |
| Model 3                           | <i>Reference</i>                            | 0.88 (0.61-1.28) | 1.06 (0.75-1.50) | 0.85 (0.50-1.45)    |

**Legend:** Sensitivity analysis limited to SMART participants that reported they were not actively employed at the moment of inclusion in the cohort (n = 3,580). This table shows hazard ratios and corresponding 95% confidence intervals all-cause mortality, recurrent cardiovascular events, and incident type 2 diabetes. In Model 1 adjustments were made for age and sex. In Model 2 adjustments were made for Model 1 + smoking status, pack years, alcohol consumption, and education. In Model 3 adjustments were made for Model 2 + diabetes mellitus, body mass index, systolic blood pressure and LDL-cholesterol levels.

\* The combined vascular endpoints was a composite of non-fatal myocardial infarction, non-fatal stroke and cardiovascular mortality.

Abbreviations: persyr: person year



**Table S6 – Hazard ratios for LTPA and OPA stratified for sex**

Table S6a: Hazard ratios for LTPA in female UCC-SMART participants

|                                   | Leisure-time physical activity level |                  |                  |                  |
|-----------------------------------|--------------------------------------|------------------|------------------|------------------|
|                                   | Quartile 1                           | Quartile 2       | Quartile 3       | Quartile 4       |
| <b>All-cause mortality</b>        |                                      |                  |                  |                  |
| Model 1                           | <i>Reference</i>                     | 0.56 (0.42-0.75) | 0.49 (0.36-0.67) | 0.48 (0.34-0.67) |
| Model 2                           | <i>Reference</i>                     | 0.59 (0.44-0.79) | 0.51 (0.37-0.70) | 0.54 (0.39-0.75) |
| Model 3                           | <i>Reference</i>                     | 0.61 (0.45-0.82) | 0.55 (0.40-0.75) | 0.57 (0.41-0.80) |
| <b>Combined vascular endpoint</b> |                                      |                  |                  |                  |
| Model 1                           | <i>Reference</i>                     | 0.67 (0.48-0.93) | 0.57 (0.40-0.81) | 0.54 (0.37-0.78) |
| Model 2                           | <i>Reference</i>                     | 0.68 (0.49-0.94) | 0.60 (0.42-0.86) | 0.58 (0.40-0.84) |
| Model 3                           | <i>Reference</i>                     | 0.73 (0.53-1.02) | 0.68 (0.47-0.97) | 0.64 (0.44-0.93) |
| <b>Type 2 diabetes</b>            |                                      |                  |                  |                  |
| Model 1                           | <i>Reference</i>                     | 0.74 (0.44-1.26) | 1.06 (0.65-1.72) | 0.82 (0.47-1.42) |
| Model 2                           | <i>Reference</i>                     | 0.76 (0.45-1.28) | 1.08 (0.66-1.77) | 0.83 (0.48-1.43) |
| Model 3                           | <i>Reference</i>                     | 0.83 (0.49-1.41) | 1.18 (0.72-1.92) | 0.91 (0.52-1.58) |

Table S6b: Hazard ratios for OPA in female UCC-SMART participants

|                                   | Occupational physical activity level |                  |                  |                  |
|-----------------------------------|--------------------------------------|------------------|------------------|------------------|
|                                   | Sedentary                            | Standing         | Manual           | Heavy manual     |
| <b>All-cause mortality</b>        |                                      |                  |                  |                  |
| Model 1                           | <i>Reference</i>                     | 1.35 (0.98-1.86) | 1.54 (1.16-2.05) | 1.11 (0.41-3.04) |
| Model 2                           | <i>Reference</i>                     | 1.16 (0.84-1.61) | 1.10 (0.82-1.47) | 0.78 (0.28-2.14) |
| Model 3                           | <i>Reference</i>                     | 1.11 (0.80-1.54) | 1.03 (0.76-1.38) | 0.71 (0.26-1.94) |
| <b>Combined vascular endpoint</b> |                                      |                  |                  |                  |
| Model 1                           | <i>Reference</i>                     | 1.19 (0.83-1.71) | 1.44 (1.05-1.96) | 1.32 (0.48-3.63) |
| Model 2                           | <i>Reference</i>                     | 1.07 (0.74-1.53) | 1.07 (0.78-1.47) | 1.01 (0.37-2.78) |
| Model 3                           | <i>Reference</i>                     | 0.98 (0.69-1.41) | 0.92 (0.66-1.27) | 0.83 (0.30-2.29) |
| <b>Type 2 diabetes</b>            |                                      |                  |                  |                  |
| Model 1                           | <i>Reference</i>                     | 0.68 (0.38-1.20) | 1.29 (0.84-1.97) | 1.71 (0.53-5.57) |
| Model 2                           | <i>Reference</i>                     | 0.65 (0.37-1.15) | 1.17 (0.76-1.82) | 1.58 (0.48-5.15) |
| Model 3                           | <i>Reference</i>                     | 0.60 (0.34-1.06) | 0.98 (0.63-1.53) | 1.17 (0.36-3.86) |

Table S6c: Hazard ratios for LTPA in male UCC-SMART participants

|                                   | Leisure-time physical activity level |                  |                  |                  |
|-----------------------------------|--------------------------------------|------------------|------------------|------------------|
|                                   | Quartile 1                           | Quartile 2       | Quartile 3       | Quartile 4       |
| <b>All-cause mortality</b>        |                                      |                  |                  |                  |
| Model 1                           | <i>Reference</i>                     | 0.72 (0.60-0.85) | 0.60 (0.51-0.72) | 0.62 (0.52-0.74) |
| Model 2                           | <i>Reference</i>                     | 0.68 (0.58-0.81) | 0.57 (0.47-0.68) | 0.56 (0.47-0.66) |
| Model 3                           | <i>Reference</i>                     | 0.70 (0.59-0.83) | 0.58 (0.48-0.69) | 0.56 (0.47-0.66) |
| <b>Combined vascular endpoint</b> |                                      |                  |                  |                  |
| Model 1                           | <i>Reference</i>                     | 0.84 (0.70-1.00) | 0.63 (0.52-0.77) | 0.72 (0.60-0.87) |
| Model 2                           | <i>Reference</i>                     | 0.82 (0.68-0.98) | 0.61 (0.51-0.74) | 0.69 (0.57-0.83) |
| Model 3                           | <i>Reference</i>                     | 0.85 (0.71-1.01) | 0.63 (0.52-0.77) | 0.69 (0.58-0.83) |
| <b>Type 2 diabetes</b>            |                                      |                  |                  |                  |
| Model 1                           | <i>Reference</i>                     | 0.77 (0.58-1.02) | 0.67 (0.50-0.90) | 0.60 (0.45-0.81) |
| Model 2                           | <i>Reference</i>                     | 0.77 (0.58-1.02) | 0.67 (0.50-0.90) | 0.60 (0.45-0.82) |
| Model 3                           | <i>Reference</i>                     | 0.81 (0.61-1.08) | 0.70 (0.52-0.95) | 0.61 (0.45-0.82) |

Table S6d: Hazard ratios for OPA in male UCC-SMART participants

|                                   | Occupational physical activity level |                  |                  |                  |
|-----------------------------------|--------------------------------------|------------------|------------------|------------------|
|                                   | Sedentary                            | Standing         | Manual           | Heavy manual     |
| <b>All-cause mortality</b>        |                                      |                  |                  |                  |
| Model 1                           | <i>Reference</i>                     | 1.37 (1.17-1.61) | 1.04 (0.87-1.25) | 1.29 (1.03-1.62) |
| Model 2                           | <i>Reference</i>                     | 1.22 (1.04-1.43) | 1.05 (0.87-1.25) | 1.23 (0.98-1.54) |
| Model 3                           | <i>Reference</i>                     | 1.17 (0.99-1.37) | 0.97 (0.80-1.16) | 1.11 (0.88-1.39) |
| <b>Combined vascular endpoint</b> |                                      |                  |                  |                  |
| Model 1                           | <i>Reference</i>                     | 1.17 (0.98-1.40) | 1.26 (1.05-1.50) | 1.37 (1.09-1.74) |
| Model 2                           | <i>Reference</i>                     | 1.01 (0.92-1.32) | 1.25 (1.04-1.49) | 1.36 (1.08-1.72) |
| Model 3                           | <i>Reference</i>                     | 1.05 (0.88-1.26) | 1.15 (0.96-1.39) | 1.20 (0.94-1.53) |
| <b>Type 2 diabetes</b>            |                                      |                  |                  |                  |
| Model 1                           | <i>Reference</i>                     | 1.17 (0.89-1.54) | 1.03 (0.77-1.38) | 1.22 (0.84-1.78) |
| Model 2                           | <i>Reference</i>                     | 1.18 (0.89-1.56) | 1.03 (0.77-1.38) | 1.22 (0.84-1.78) |
| Model 3                           | <i>Reference</i>                     | 1.11 (0.84-1.47) | 0.91 (0.67-1.23) | 1.05 (0.71-1.55) |

**Legend:** Sensitivity analyses stratified for sex. These tables shows hazard ratios and corresponding 95% confidence intervals all-cause mortality, recurrent cardiovascular events, and incident type 2 diabetes. In Model 1 adjustments were made for age and sex. In Model 2 adjustments were made for Model 1 + smoking status, pack years, alcohol consumption, and education. In Model 3 adjustments were made for Model 2 + diabetes mellitus, body mass index, systolic blood pressure and LDL-cholesterol levels.

\* The combined vascular endpoints was a composite of non-fatal myocardial infarction, non-fatal stroke and cardiovascular mortality.
